# Supplementary material for: Sex differences in thermal detection and thermal pain threshold and the thermal grill illusion: a psychophysical study in young volunteers
Source: PubMed Central journal article supplement (PMC5579939; doi:10.1186/s13293-017-0147-5), 2017-09-01

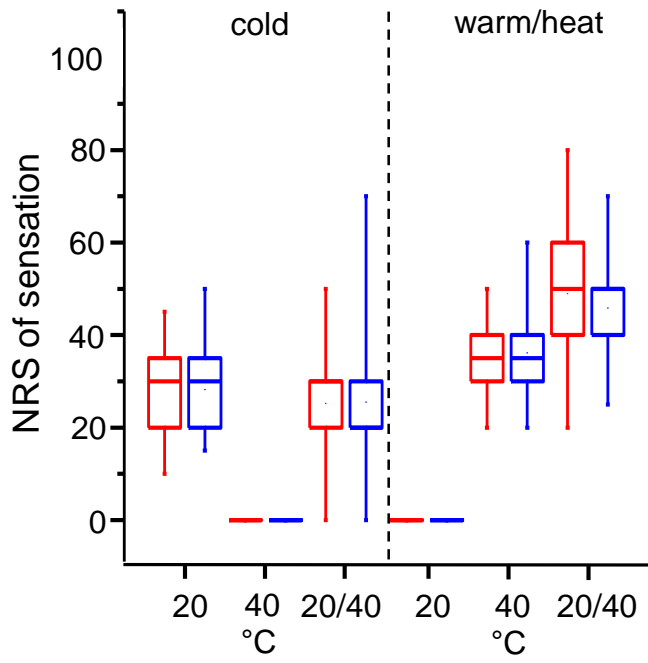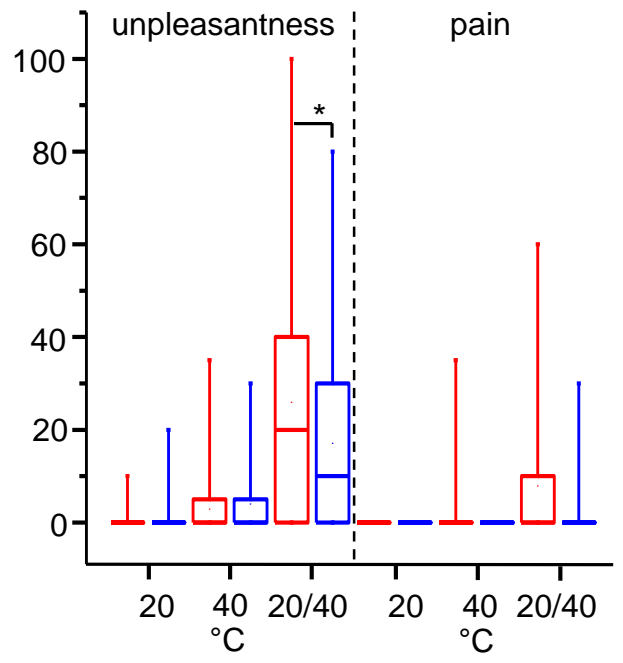

Supplement: 13293_2017_147_MOESM2_ESM.pdf [file 13293_2017_147_MOESM2_ESM.pdf]
